# Supplementary material for: Booster dose of BNT162b2 after two doses of CoronaVac improves neutralization of SARS-CoV-2 Omicron variant
Source: PubMed Central journal article supplement (PMC9242982; doi:10.1038/s43856-022-00141-4), 2022-06-29
Supplement: 43856_2022_141_MOESM1_ESM.pdf [file 43856_2022_141_MOESM1_ESM.pdf]

**SUPPLEMENTARY TABLE 1**

| ID  | Age   | Gender | Comorbidities                                                  | Prior infection | ID   | Age   | Gender | Comorbidities                        | Prior infection |
|-----|-------|--------|----------------------------------------------------------------|-----------------|------|-------|--------|--------------------------------------|-----------------|
| 7   | 31-50 | Male   | No                                                             | No              | 382  | 31-50 | Male   | Tobacco smoker                       | No              |
| 9   | 31-50 | Male   | No                                                             | May 2020        | 386  | 31-50 | Male   | Obesity - Diabetes                   | No              |
| 16  | 31-50 | Female | No                                                             | June 2020       | 392  | 51-62 | Female | Tobacco smoker                       | No              |
| 18  | 31-50 | Female | Hypothyroidism                                                 | No              | 394  | 31-50 | Female | Chronic rhinitis - Chronic sinusitis | No              |
| 22  | 18-30 | Female | No                                                             | No              | 396  | 31-50 | Female | No                                   | No              |
| 39  | 31-50 | Male   | No                                                             | No              | 402  | 18-30 | Female | No                                   | No              |
| 47  | 18-30 | Female | No                                                             | No              | 421  | 31-50 | Female | No                                   | September 2020  |
| 48  | 31-50 | Female | No                                                             | No              | 426  | 51-62 | Female | Systemic arterial hypertension       | No              |
| 69  | 31-50 | Male   | Systemic arterial hypertension                                 | No              | 438  | 31-50 | Male   | Systemic arterial hypertension       | August 2020     |
| 75  | 31-50 | Female | No                                                             | No              | 440  | 18-30 | Female | No                                   | December 2020   |
| 75  | 31-50 | Female | No                                                             | No              | 441  | 31-50 | Male   | No                                   | No              |
| 98  | 51-62 | Female | No                                                             | No              | 444  | 51-62 | Female | No                                   | No              |
| 100 | 51-62 | Female | Hypothyroidism - Dyslipidemia - Systemic arterial hypertension | No              | 446  | 31-50 | Female | No                                   | No              |
| 111 | 31-50 | Female | No                                                             | No              | 448  | 31-50 | Female | No                                   | No              |
| 129 | 31-50 | Female | No                                                             | December 2020   | 452  | 18-30 | Female | No                                   | No              |
| 132 | 51-62 | Male   | No                                                             | No              | 469  | 51-62 | Female | Systemic arterial hypertension       | No              |
| 151 | 31-50 | Female | No                                                             | No              | 491  | 31-50 | Female | No                                   | No              |
| 152 | 18-30 | Female | Diabetes                                                       | No              | 512  | 31-50 | Female | Hypothyroidism                       | No              |
| 156 | 31-50 | Female | No                                                             | No              | 523  | 31-50 | Female | Systemic arterial hypertension       | No              |
| 160 | 31-50 | Female | Asthma                                                         | No              | 553  | 31-50 | Male   | No                                   | No              |
| 170 | 31-50 | Female | Systemic arterial hypertension                                 | No              | 566  | 31-50 | Female | Obesity                              | No              |
| 177 | 18-30 | Female | No                                                             | No              | 570  | 18-30 | Male   | No                                   | No              |
| 182 | 18-30 | Male   | No                                                             | No              | 599  | 31-50 | Female | No                                   | No              |
| 186 | 31-50 | Female | Hyperthyroidism                                                | No              | 710  | 31-50 | Female | Systemic arterial hypertension       | No              |
| 199 | 18-30 | Female | No                                                             | No              | 813  | 31-50 | Male   | No                                   | No              |
| 206 | 51-62 | Female | Systemic arterial hypertension - Tobacco smoker                | No              | 837  | 31-50 | Female | No                                   | No              |
| 224 | 31-50 | Male   | No                                                             | No              | 896  | 31-50 | Female | Diabetes                             | December 2020   |
| 225 | 31-50 | Male   | No                                                             | December 2020   | 948  | 31-50 | Female | No                                   | No              |
| 231 | 31-50 | Female | No                                                             | No              | 1016 | 31-50 | Female | No                                   | No              |
| 241 | 31-50 | Female | No                                                             | No              | 1028 | 31-50 | Female | Hypothyroidism - Thrombophilia       | No              |
| 260 | 18-30 | Female | No                                                             | No              | 1043 | 31-50 | Female | No                                   | July 2020       |
| 274 | 51-62 | Female | No                                                             | No              | 1062 | 18-30 | Female | No                                   | No              |
| 302 | 31-50 | Female | No                                                             | No              | 1109 | 31-50 | Female | No                                   | No              |
| 304 | 31-50 | Female | No                                                             | No              | 1135 | 31-50 | Female | No                                   | No              |
| 305 | 51-62 | Female | Diabetes - Hypothyroidism                                      | No              | 1167 | 31-50 | Male   | No                                   | No              |
| 307 | 18-30 | Female | No                                                             | No              | 1217 | 31-50 | Male   | No                                   | No              |
| 321 | 18-30 | Female | No                                                             | No              | 1337 | 18-30 | Male   | No                                   | No              |
| 324 | 51-62 | Male   | No                                                             | No              | 1354 | 31-50 | Female | No                                   | No              |
| 326 | 18-30 | Female | No                                                             | No              | 1377 | 31-50 | Male   | No                                   | No              |
| 336 | 31-50 | Female | No                                                             | No              | 1488 | 31-50 | Female | No                                   | No              |
| 341 | 31-50 | Female | No                                                             | No              | 1506 | 18-30 | Male   | No                                   | No              |
| 353 | 31-50 | Female | No                                                             | No              | 1554 | 18-30 | Female | No                                   | No              |
| 362 | 18-30 | Female | Tobacco smoker                                                 | July 2020       | 1575 | 31-50 | Female | No                                   | December 2020   |
| 372 | 51-62 | Female | Systemic arterial hypertension                                 | No              | 1588 | 18-30 | Female | No                                   | No              |
| 375 | 18-30 | Male   | No                                                             | No              | 1617 | 31-50 | Female | No                                   | No              |

**Supplementary Table 1: Detailed cohort data.** Complete information for each individual included in the study.
