# Supplementary material for: Booster dose of BNT162b2 after two doses of CoronaVac improves neutralization of SARS-CoV-2 Omicron variant
Source: PubMed Central journal article supplement (PMC9242982; doi:10.1038/s43856-022-00141-4), 2022-06-29
Supplement: 43856_2022_141_MOESM3_ESM.pdf [file 43856_2022_141_MOESM3_ESM.pdf]

## **Description of Additional Supplementary Files**

**File Name:** Supplementary Data

**Description:** VNT50 individual raw data
